# Supplementary material for: Patient Falls and Injuries in U.S. Psychiatric Care: Incidence and Trends
Source: Atypon-hosted journal article supplement (doi:10.1176/appi.ps.202000004), 2020-06-30
Supplement: appi.ps.202000004.ds001.pdf [file appi.ps.202000004.ds001.pdf]

**Supplemental File. Predictors of Fall Resulting in Any Injury and in Moderate or Greater Injury**

| Variable                                                | Any Injury                |        | Moderate or Greater Injury |        |
|---------------------------------------------------------|---------------------------|--------|----------------------------|--------|
|                                                         | aOR <sup>1</sup> (95% CI) | p      | aOR <sup>1</sup> (95% CI)  | p      |
| Psychiatric hospital (vs. general hospital)             | 1.25 (1.08, 1.44)         | 0.003  | 1.00 (0.80, 1.25)          | 0.988  |
| Geriatric psychiatric unit (vs. adult psychiatric unit) | 1.20 (1.10, 1.32)         | <0.001 | 1.66 (1.47, 1.88)          | <0.001 |
| Fall unassisted (vs. assisted)                          | 1.69 (1.59, 1.80)         | <0.001 | 1.56 (1.33, 1.82)          | <0.001 |

<sup>1</sup> Adjusted odds ratio (95% confidence interval).
